# Supplementary material
Source: PubMed Central journal article supplement (PMC5312243)
Supplement: 81.1.e00048-16_zmr001172455s1.pdf [file 81.1.e00048-16_zmr001172455s1.pdf]

**Table S1. Examples of prokaryotic "lifestyles" in respect to heme and siroheme**

|                                                                 | ALA biosynthesis |             |                  | Uro'gen III biosynthesis |             |             | Siroheme biosynthesis |             |                         | Heme biosynthesis, alternative |             |             |             | Heme biosynthesis, transitional and classic pathways |              |             |                          |              |             |             | Sample organism                       |                                    |                                        |
|-----------------------------------------------------------------|------------------|-------------|------------------|--------------------------|-------------|-------------|-----------------------|-------------|-------------------------|--------------------------------|-------------|-------------|-------------|------------------------------------------------------|--------------|-------------|--------------------------|--------------|-------------|-------------|---------------------------------------|------------------------------------|----------------------------------------|
|                                                                 | C5 pathway       |             | C4 path          | common pathway           |             |             |                       |             |                         | siroheme-dependent             |             |             |             | coproporphyrin-dependent                             |              |             | protoporphyrin-dependent |              |             |             |                                       |                                    |                                        |
|                                                                 | GltR             | GAST        | ALAS             | PBS                      | PBD         | UROS        | UROM                  | PR2O        | SIRFC *                 | AhbA                           | AhbB        | AhbC        | AhbD        | UROD                                                 | Copro'gen OX | Copro DC    | Copro FC                 | Copro'gen DC | Pro'gen OX  | Proto FC    |                                       |                                    |                                        |
| Historic enzyme and gene names:                                 | <i>hemA (C5)</i> | <i>hemL</i> | <i>hemA (C4)</i> | <i>hemB</i>              | <i>hemC</i> | <i>hemD</i> | <i>(cysG)*</i>        | <i>CysG</i> | <i>CysG, SirB, ChkK</i> | <i>ahbA</i>                    | <i>ahbB</i> | <i>ahbC</i> | <i>ahbD</i> | <i>hemE</i>                                          | <i>hemY</i>  | <i>hemQ</i> | <i>hemH(c)</i>           | <i>hemF</i>  | <i>hemN</i> | <i>hemG</i> | <i>hemJ</i>                           | <i>hemH(p)</i>                     |                                        |
| Proposed new enzyme nomenclature:                               | GtrR             | GsaM        | AlaS             | PbgS                     | HmbS        | UroS        |                       |             |                         |                                |             |             |             | UroD                                                 | CgoX/PgoX    | ChdC        | CpfC                     | CgdC         | CgdH        | PgdH1       | PgdH2                                 | PpfC                               |                                        |
| <b>Signature genes for:</b>                                     |                  |             |                  |                          |             |             |                       |             |                         |                                |             |             |             |                                                      |              |             |                          |              |             |             |                                       |                                    |                                        |
| siroheme-dependent route >>                                     | [Green bar]      |             |                  |                          |             |             |                       |             |                         |                                |             |             |             | NO                                                   |              |             |                          |              |             |             |                                       |                                    |                                        |
| coproporphyrin-dependent route >>                               | [Green bar]      |             |                  |                          |             |             |                       |             |                         |                                |             |             |             | YES                                                  | [Blue bar]   |             |                          | [Orange bar] |             |             |                                       |                                    |                                        |
| protoporphyrin-dependent route >>                               | [Green bar]      |             |                  |                          |             |             |                       |             |                         |                                |             |             |             | YES                                                  | [Orange bar] |             |                          |              |             |             |                                       |                                    |                                        |
| <b>Examples of the 3 basic routes of heme bios:</b>             |                  |             |                  |                          |             |             |                       |             |                         |                                |             |             |             |                                                      |              |             |                          |              |             |             |                                       |                                    |                                        |
| siroheme-dependent >>                                           | +                | +           |                  | +                        | +           | +           | +                     | +           | +                       | +                              | +           | +           | +           |                                                      |              |             |                          |              |             |             |                                       |                                    |                                        |
| coproporph-dependent (via HemQ) >>                              | +                | +           |                  | +                        | +           | +           | +                     | +           | +                       |                                |             |             |             | +                                                    | +            | +           | +                        |              |             |             |                                       |                                    |                                        |
| coproporph-dependent (via AhbD) >>                              | +                | +           |                  | +                        | +           | +           | +                     | +           | +                       |                                |             |             | +           | +                                                    | +            | +           |                          |              |             |             |                                       |                                    |                                        |
| protoporphyrin-dependent >>                                     | +                | +           |                  | +                        | +           | +           | +                     | +           | +                       |                                |             |             |             | +                                                    |              |             |                          | +            | +           |             | +                                     | +                                  |                                        |
| <b>Coexistence of 2 heme routes in one org:</b>                 |                  |             |                  |                          |             |             |                       |             |                         |                                |             |             |             |                                                      |              |             |                          |              |             |             |                                       |                                    |                                        |
| two heme routes are present (2 FCs) >>                          | +                | +           |                  | +                        | +           | +           | +                     | +           | +                       |                                |             |             |             | +                                                    | +            | +           | +                        | +            | +           | +           | +                                     | +                                  | +                                      |
| two heme routes are present >>                                  | +                | +           |                  | +                        | +           | +           | +                     | +           | +                       | ?                              | ?           |             |             | +                                                    | +            | +           | +                        | +            | +           | +           | +                                     | +                                  | +                                      |
| <b>Variations in the source of uro'gen III:</b>                 |                  |             |                  |                          |             |             |                       |             |                         |                                |             |             |             |                                                      |              |             |                          |              |             |             |                                       |                                    |                                        |
| de novo ALA bios. via C5 pathway >>                             | +                | +           |                  | +                        | +           | +           | +                     | +           | +                       |                                |             |             |             | +                                                    |              |             |                          | +            | +           | +           | +                                     | +                                  | +                                      |
| both, C4 and C5 pathways are present >>                         | +                | +           | +                | +                        | +           | +           | +                     | +           | +                       |                                |             |             |             | +                                                    | +            |             |                          | +            | +           | +           | +                                     | +                                  | +                                      |
| de novo ALA bios via C4 pathway >>                              |                  |             | +                | +                        | +           | +           | +                     | +           | +                       |                                |             |             |             | +                                                    |              |             |                          | +            | +           | +           | +                                     | +                                  | +                                      |
| dependence on exogenous ALA >>                                  |                  |             |                  | +                        | +           | +           | +                     | +           | +                       |                                |             |             |             | +                                                    |              |             |                          | +            | +           | +           | +                                     | +                                  | +                                      |
| dependence on porphobilinogen >>                                |                  |             |                  |                          | +           | +           | +                     | +           | +                       |                                |             |             |             | +                                                    |              |             |                          | +            | +           | +           | +                                     | +                                  | +                                      |
| dependence on porphobilinogen >>                                |                  |             |                  |                          | +           | +           | +                     | +           | +                       |                                |             |             |             | +                                                    |              |             |                          | +            | +           | +           | +                                     | +                                  | +                                      |
| dependence on exogenous uro'gen III >>                          |                  |             |                  |                          |             |             | +                     | +           | +                       |                                |             |             |             | +                                                    |              |             |                          | +            | +           | +           | +                                     | +                                  | +                                      |
| <b>Dependence on exogenous heme/siroheme? -</b>                 |                  |             |                  |                          |             |             |                       |             |                         |                                |             |             |             |                                                      |              |             |                          |              |             |             |                                       |                                    |                                        |
| protoheme ferrochelatase only >>                                |                  |             |                  |                          |             |             |                       |             |                         |                                |             |             |             |                                                      |              |             |                          |              |             |             | +                                     | <i>Streptococcus pneumoniae R6</i> |                                        |
| siroheme ferrochelatase only >>                                 |                  |             |                  |                          |             |             |                       |             |                         |                                |             |             |             |                                                      |              |             |                          |              |             | +           | <i>Treponema denticola ATCC 35405</i> |                                    |                                        |
| <b>Predicted "hybrid" paths for heme or other tetrapyrroles</b> |                  |             |                  |                          |             |             |                       |             |                         |                                |             |             |             |                                                      |              |             |                          |              |             |             |                                       |                                    |                                        |
| path with archaeal ChdC(long) + AhbCD                           | +                | +           |                  | +                        | +           | +           | +                     | +           | +                       |                                |             |             |             | +                                                    | +            |             |                          | long         |             |             |                                       |                                    | <i>Halobacterium sp. NRC-1</i>         |
| path with archaeal ChdC(long) + AhbCD + more                    | +                | +           |                  | +                        | +           | +           | +                     | +           | +                       |                                |             |             |             | +                                                    | +            | +           |                          | long         |             |             | +                                     | +                                  | <i>Halorhabdus utahensis DSM 12940</i> |
|                                                                 | +                | +           |                  | +                        | +           | +           | +                     | +           | +                       |                                |             |             |             | +                                                    | +            | ?           |                          |              |             |             |                                       |                                    | <i>Thermoplasma volcanium GSSI</i>     |
| path with AhbAB + HemQ                                          | +                | +           |                  | +                        | +           | +           | +                     | +           | +                       |                                |             |             |             | +                                                    | +            |             |                          | +            |             |             |                                       |                                    | <i>Deinococcus geothermalis DSM</i>    |
| path with AhbAB + classic heme bios                             | +                | +           |                  | +                        | +           | +           | +                     | +           | +                       |                                |             |             |             | +                                                    |              |             |                          |              |             | +           | +                                     | +                                  | <i>Persephonella marina EX-H1</i>      |

**Table S2.** Signature genes for detection of the 3 main routes of heme biosynthesis in prokaryotic genomes

|                                          | <b>Heme biosynthesis, alternative</b> |             |             |             | <b>Heme biosynthesis, transitional and classic pathways</b> |              |             |                |                          |             |             |             | <b>Sample organisms</b>                                     |
|------------------------------------------|---------------------------------------|-------------|-------------|-------------|-------------------------------------------------------------|--------------|-------------|----------------|--------------------------|-------------|-------------|-------------|-------------------------------------------------------------|
|                                          | siroheme-dependent                    |             |             |             | coproporphyrin-dependent                                    |              |             |                | protoporphyrin-dependent |             |             |             |                                                             |
| <b>Historic enzyme/gene names:</b>       | AhbA                                  | AhbB        | AhbC        | AhbD        | <b>UROD</b>                                                 | Copro'gen OX | Copro DC    | Copro FC       | Copro'gen DC             | Pro'gen OX  | Proto FC    |             |                                                             |
|                                          | <i>ahbA</i>                           | <i>ahbB</i> | <i>ahbC</i> | <i>ahbD</i> | <i>hemE</i>                                                 | <i>hemY</i>  | <i>hemQ</i> | <i>hemH(c)</i> | <i>hemF</i>              | <i>hemN</i> | <i>hemJ</i> | <i>hemG</i> | <i>hemH(p)</i>                                              |
| <b>Proposed new enzyme nomenclature:</b> |                                       |             |             |             | UroD                                                        | CgoX/PgoX    | ChdC        | CpfC           | CgdC                     | CgdH        | PgdH1       | PgdH2       | PpfC                                                        |
| siroheme-dependent route                 |                                       |             |             |             | NO                                                          |              |             |                |                          |             |             |             | <i>Desulfovibrio vulgaris</i> ; <i>Sulfolobus tokodaii</i>  |
| coproporphyrin-dependent route           |                                       |             |             |             | YES                                                         |              |             |                |                          |             |             |             | <i>Geobacter sulfurreducens</i> ; <i>Bacillus subtilis</i>  |
| protoporphyrin-dependent route           |                                       |             |             |             | YES                                                         |              |             |                |                          |             |             |             | <i>Escherichia coli K12</i> ; <i>Neisseria meningitidis</i> |

**Table S3. Phylogenetic distribution of the siro-, copro-, and proto- dependent routes of heme biosynthesis among the 983 representative prokaryotic genomes.** See SEED subsystem for details:  
[http://pubseed.theseed.org/SubsysEditor.cgi?page=ShowSubsystem&subsystem=Heme\\_Biosynthesis%3A\\_protoporphyrin-\\_and\\_coproporphyrin-dependent\\_pathways](http://pubseed.theseed.org/SubsysEditor.cgi?page=ShowSubsystem&subsystem=Heme_Biosynthesis%3A_protoporphyrin-_and_coproporphyrin-dependent_pathways)

| Major taxa analysed                  | Total genomes from taxon included in the 983 set         | Number of organisms per taxon encoding each of the 3 main heme biosynthesis pathways |         |     |     | Fraction of organisms per taxon with each of the 3 heme biosynthesis pathways (%) |         |     |     |
|--------------------------------------|----------------------------------------------------------|--------------------------------------------------------------------------------------|---------|-----|-----|-----------------------------------------------------------------------------------|---------|-----|-----|
|                                      |                                                          | NO heme biosynthesis                                                                 | AhbABCD | CPD | PPD | NO heme biosynthesis                                                              | AhbABCD | CPD | PPD |
|                                      |                                                          | Total cases among the 983 orgs:                                                      |         |     |     |                                                                                   |         |     |     |
|                                      |                                                          | 233                                                                                  | 76      | 166 | 471 |                                                                                   |         |     |     |
|                                      |                                                          | 24%                                                                                  | 8%      | 17% | 48% |                                                                                   |         |     |     |
| <b>Archaea</b>                       | <b>Archaea</b>                                           |                                                                                      |         |     |     |                                                                                   |         |     |     |
|                                      | Crenarchaeota                                            | 17                                                                                   | 3       | 12  | -   | -                                                                                 |         |     |     |
|                                      | Euryarchaeota                                            | 35                                                                                   | 19      | 8   | -   | -                                                                                 |         |     |     |
|                                      | Korarchaeota                                             | 1                                                                                    | -       | -   | -   | -                                                                                 |         |     |     |
|                                      | Nanoarchaeota                                            | 1                                                                                    | 1       | -   | -   | -                                                                                 |         |     |     |
| <b>Eubacteria</b><br><i>Monoderm</i> | <b>Actinobacteria</b>                                    | 99                                                                                   | 13      | 3   | 81  | -                                                                                 |         |     |     |
|                                      | <b>Firmicutes:</b>                                       |                                                                                      |         |     |     |                                                                                   |         |     |     |
|                                      | Bacillales                                               | 36                                                                                   | -       | 1   | 34  | -                                                                                 |         |     |     |
|                                      | Clostridia                                               | 91                                                                                   | 62      | 25  | 4   | -                                                                                 |         |     |     |
|                                      | Lactobacillales                                          | 42                                                                                   | 42      | -   | -   | -                                                                                 |         |     |     |
|                                      | Erysipelotrichales                                       | 7                                                                                    | 7       | -   | -   | -                                                                                 |         |     |     |
|                                      | Negativicutes                                            | 3                                                                                    | 2       | 1   | -   | -                                                                                 |         |     |     |
|                                      | Chloroflexi (green non-sulfur bacteria)                  | 11                                                                                   | 2       | 1   | 6   | 2                                                                                 |         |     |     |
|                                      | Thermotogae*                                             | 10                                                                                   | 10      | -   | -   | -                                                                                 |         |     |     |
| <i>Transitional</i>                  | Deinococcus-Thermus                                      | 10                                                                                   | -       | -   | 8   | 1                                                                                 |         |     |     |
| <b>Eubacteria</b><br><i>Diderm</i>   | <b>Proteobacteria:</b>                                   |                                                                                      |         |     |     |                                                                                   |         |     |     |
|                                      | Alphaproteobacteria                                      | 109                                                                                  | 4       | -   | -   | 106                                                                               |         |     |     |
|                                      | Betaproteobacteria                                       | 62                                                                                   | 1       | -   | -   | 61                                                                                |         |     |     |
|                                      | Gammaproteobacteria                                      | 174                                                                                  | 11      | -   | 4   | 159                                                                               |         |     |     |
|                                      | Epsilonproteobacteria                                    | 27                                                                                   | -       | -   | -   | 27                                                                                |         |     |     |
|                                      | Zetaproteobacteria                                       | 1                                                                                    | -       | -   | -   | 1                                                                                 |         |     |     |
|                                      | Deltaproteobacteria                                      | 38                                                                                   | -       | 19  | 13  | 5                                                                                 |         |     |     |
|                                      | Acidobacteria                                            | 4                                                                                    | -       | 1   | 3   | -                                                                                 |         |     |     |
|                                      | Aquificae (class)                                        | 9                                                                                    | -       | -   | 2   | 7                                                                                 |         |     |     |
|                                      | Armatimonadetes                                          | 1                                                                                    | -       | -   | -   | -                                                                                 |         |     |     |
|                                      | Bacteroidetes/Chlorobi; Bacteroidetes                    | 70                                                                                   | 15      | -   | -   | 51                                                                                |         |     |     |
|                                      | Bacteroidetes/Chlorobi; Chlorobi (green sulfur bacteria) | 9                                                                                    | -       | -   | -   | 9                                                                                 |         |     |     |
|                                      | Chlamydiae/Verrucomicrobia group                         | 12                                                                                   | -       | 1   | -   | 9                                                                                 |         |     |     |
|                                      | Cyanobacteria                                            | 25                                                                                   | -       | -   | -   | 25                                                                                |         |     |     |
|                                      | Deferribacteres                                          | 2                                                                                    | -       | -   | 2   | -                                                                                 |         |     |     |
|                                      | Fusobacteria*                                            | 6                                                                                    | 6       | -   | -   | -                                                                                 |         |     |     |
|                                      | Gemmatimonadetes                                         | 1                                                                                    | -       | -   | -   | 1                                                                                 |         |     |     |
|                                      | Nitrospira                                               | 3                                                                                    | -       | -   | 2   | 1                                                                                 |         |     |     |
|                                      | Planctomycetes                                           | 7                                                                                    | -       | -   | 7   | -                                                                                 |         |     |     |
|                                      | Spirochaetes                                             | 18                                                                                   | 13      | -   | -   | 5                                                                                 |         |     |     |
|                                      | Synergistetes                                            | 9                                                                                    | 7       | 2   | -   | -                                                                                 |         |     |     |
|                                      | Thermodesulfobacteria                                    | 2                                                                                    | -       | 2   | -   | -                                                                                 |         |     |     |
|                                      | Chrysiogenetes                                           | 1                                                                                    | -       | -   | 1   | -                                                                                 |         |     |     |
|                                      | Tenericutes; Mollicutes*                                 | 17                                                                                   | 17      | -   | -   | -                                                                                 |         |     |     |
|                                      | Caldithrix                                               | 1                                                                                    | -       | -   | -   | 1                                                                                 |         |     |     |
|                                      | Thermobaculum                                            | 1                                                                                    | -       | -   | -   | -                                                                                 |         |     |     |

Phyla that include photosynthetic organisms are highlighted in green

\*: no heme biosynthetic genes detected in any representatives of this taxon with sequenced genomes
